# Supplementary material
Source: publisher site journal article supplement (https://www.dovepress.com/get_supplementary_file.php?f=348598.docx)
Supplement: Supplementary file 1 [file get_supplementary_file.php]

Supplementary materials

**1 Characterization of mPEG-DCA, mPEG-DCA-DTPA and mPEG-DCA-SA**

The 1H-NMR spectra (Fig. S1) of mPEG-DCA, mPEG-DCA-DTPA and mPEG-DCA-SA was analyzed as follows. mPEG-DCA (Chloroform-*d*): [δ 4.22 (s, 2H), 3.88 (s, 2H), 3.64 (d, J = 2.3 Hz, 217H), 3.56 (s, 3H), 3.38 (d, J = 2.3 Hz, 6H), 1.96 ~ 1.03 (m, 45H), 0.97 (d, J = 5.7 Hz, 3H), 0.91 (s, 3H), 0.68 (s, 3H)]; mPEG-DCA-SA (DMSO-d6): [δ 12.21 (s, 1H), 4.58 (t, J = 5.5 Hz, 1H), 4.47 ~ 4.36 (m, 1H), 4.24 (d, J = 4.1 Hz, 1H), 4.14 ~ 4.08 (m, 3H), 3.68 (s, 2H), 3.43 (d, J = 5.7 Hz, 8H), 3.33 (s, 26H), 3.24 (s, 6H), 2.48 ~ 2.44 (m, 2H), 2.37 ~ 2.16 (m, 3H), 1.91 (s, 1H), 1.80 ~ 1.61 (m, 5H), 1.47 (s, 2H), 1.35 (s, 4H), 1.27 ~ 1.17 (m, 4H), 1.16 ~ 1.04 (m, 6H), 0.99 (d, J = 12.1 Hz, 2H), 0.87 (d, J = 6.2 Hz, 3H), 0.83 (s, 3H), 0.61 (d, J = 5.4 Hz, 3H)]; and mPEG-DCA-DTPA (DMSO-d6): [δ 12.37 (s, 1H), 4.52 (d, J = 34.9 Hz, 2H), 4.22 ~ 4.08 (m, 4H), 3.43 (s, 16H), 3.33 (s, 15H), 3.24 (d, J = 2.4 Hz, 10H), 2.88 (s, 3H), 2.72 (s, 2H), 2.63 (d, J = 7.1 Hz, 2H), 2.28 (s, 2H), 1.76 (s, 7H), 1.61 ~ 1.05 (m, 19H), 0.91 (d, J = 5.7 Hz, 3H), 0.84 (s, 3H), 0.59 (s, 3H)].

The 1H-NMR spectra of PTX, PDCP, and PDSP were shown in Fig. S2. These 1H-NMR spectra were as follows. PTX (Chloroform-*d*): [δ 8.13 (m, 2H, o-2O-ArH), 7.74 (dt, J = 7.0, 1.4 Hz, 2H, o-3’NH-ArH), 7.60 (m, 1H, p-2O-ArH), 7.55 ~ 7.33 (m, 10H, 3’-ArH and 2O-ArH and 3’NH-ArH), 6.99 (d, J = 8.8 Hz, 1H, 1H, 3’-NH-), 6.31 ~ 6.16 (m, 2H, 10-H and 13-H), 5.79 (dd, J = 8.9, 2.6 Hz, 1H, 3’-H), 5.67 (d, J = 7.0 Hz, 1H, 2-H), 4.94 (dd, J = 9.7, 2.2 Hz, 1H, 5H), 4.79 (d, J = 2.7 Hz, 1H, 2’-H), 4.40 (dd, J = 10.9, 6.7 Hz, 1H, 7-H), 4.30 (d, J = 8.4 Hz, 1H, 20-H), 4.23 ~ 4.16 (m, 1H, 20-H), 3.80 (d, J = 7.0 Hz, 1H, 3-H), 2.58 ~ 2.54 (m, 6-HH), 2.42 ~ 2.27 (m, 5H, 4O-Ac-H and 14H2 ), 2.24 (s, 3H, 10O-Ac-H), 1.88 (ddd, J = 14.8, 10.9, 2.4 Hz, 2H, 6-HH), 1.79 (d, J = 1.4 Hz, 3H, 18-H3), 1.24 (s, 3H, 16-H3), 1.14 (s, 3H, 17-H3)]; PDCP (DMSO-*d*6): [δ 9.22 (d, *J* = 8.6 Hz, 1H), 8.25 (d, *J* = 8.0 Hz, 1H), 8.00 ~ 7.95 (m, 3H), 7.87 ~ 7.84 (m, 3H), 7.74 (t, *J* = 7.3 Hz, 2H), 7.66 (t, *J* = 7.5 Hz, 3H), 7.56 (d, *J* = 5.8 Hz, 1H), 7.53 ~ 7.42 (m, 10H), 7.20 (d, *J* = 4.1 Hz, 1H), 6.29 (s, 2H), 5.82 (t, *J* = 9.1 Hz, 2H), 5.55 (t, *J* = 8.7 Hz, 2H), 5.38 (dd, *J* = 24.4, 8.1 Hz, 4H), 4.93 ~ 4.89 (m, 3H), 4.64 (s, 2H), 4.20 (s, 1H), 4.13 – 4.05 (m, 4H), 3.43 (d, *J* = 5.3 Hz, 6H), 3.33 (s, 40H), 3.24 (s, 6H), 2.66 (d, *J* = 6.0 Hz, 3H), 2.61 (d, *J* = 5.7 Hz, 2H), 2.55 (d, *J* = 5.3 Hz, 1H), 2.34 ~ 2.29 (m, 2H), 2.24 (s, 5H), 2.10 (s, 5H), 1.86 ~ 1.60 (m, 18H), 1.49 (s, 9H), 1.24 (s, 12H), 1.01 (d, *J* = 11.2 Hz, 10H), 0.93 – 0.80 (m, 6H), 0.59 (s, 3H)]; PDSP(DMSO-*d*6): [δ 8.08 – 7.79 (m, 3H), 7.70 (dt, *J* = 31.0, 7.4 Hz, 2H), 7.60 ~ 7.39 (m, 5H), 6.29 (s, 1H), 5.82 (t, *J* = 9.0 Hz, 1H), 5.66 ~ 5.32 (m, 2H), 4.21 (d, *J* = 4.4 Hz, 1H), 4.17 ~ 4.09 (m, 4H), 4.01 (d, *J* = 3.8 Hz, 1H), 3.68 (s, 2H), 3.44 ~ 3.30 (m, 43H), 3.24 (s, 5H), 2.96 – 2.81 (m, 6H), 2.74 ~ 2.65 (m, 3H), 2.24 (s, 2H), 2.10 (s, 2H), 1.75 (d, *J* = 22.5 Hz, 8H), 1.50 (s, 3H), 1.26 (td, *J* = 31.5, 30.1, 14.5 Hz, 12H), 1.09 (t, *J* = 7.0 Hz, 9H), 1.01 (d, *J* = 11.1 Hz, 5H), 0.91 (dd, *J* = 6.5, 3.0 Hz, 3H), 0.86 (d, *J* = 10.5 Hz, 3H), 0.59 (d, *J* = 2.1 Hz, 3H)].

As showed in Fig. S3, in the infrared spectrum of mPEG-DCA, the stretching vibration peak of carbonyl VC=O was at 1734.0 cm-1, and the stretching vibration peak of methyl VC-H was showed at 1344.4 cm-1. Also, the in-plane rocking vibration peak, in-plane deformation vibration peak, and symmetrical stretching vibration peak of VC-H in the structure of mPEG were displayed at 842.9 cm-1, 1467.8 cm-1, and 2885.5 cm-1, and the stretching vibration peak of VC-O-C was showed at 1111.0 cm-1. In the infrared spectrum of PTX, there was an overlap between the stretching vibration absorption peak of hydroxyl VO-H and the stretching vibration peak of VN-H at 3300-3500 cm-1. The VC-H stretching vibration peak on the benzene ring was at 2943.4 cm-1, the peaks at 1734.0 cm-1 and 1712.8 cm-1 were assigned to two splitting peaks of ketone carbonyl VC=O. The peak at 1645.3 cm-1 was ascribed to the carbonyl in the amide group, and the stretching vibration peak of the VC-N bond was at 1244.1 cm-1. The stretching vibration absorption peak of VC-O in secondary alcohols and tertiary alcohols were at 1072.4 cm-1 and 1109.1 cm-1. The peak at 709.8 cm-1 was the characteristic absorption peak of a monosubstituted benzene ring. In the infrared spectrum of mPEG-DCA-SA, we can see the symmetrical stretching vibration peaks of VC-H in DCA’s structure at 2885.5 cm-1, which overlapped with the stretching vibration peak of carboxyl VO-H and the symmetrical stretching vibration peak of VC-H in the structure of mPEG. The stretching vibration peaks of VC=O in carboxyl and ester at 1735.9 cm-1. Similarly, the peak position of each functional group in mPEG-DCA-DTPA was similar to that in mPEG-DCA-SA.

**2 The fitting equations of CCD-response surface method**

***Multiple linear equation***

Y1=180.40278-0.95389X1+0.29X2+1.77944X3, r2=0.6232 (Eq. S1)

Y2=0.32346+0.01X1+0.01X2+0.026X3, r2=0.5106 (Eq. S2)

***Quadratic polynomial***

Y1=314.15972-1.87222X1-2.21375X2-0.31347X3+3.50000×10-3X1X2-0.075833 X1X3-0.035813X2X3+0.023167X32+0.015313X22+0.22717X32, r2=0.8513 (Eq. S3)

Y2=1.38011-0.038590X1-5.02812×10-3X2+4.55139×10-3X3-4.93750×10-5X1X2-1.39167×10-4X1X3-3.52000×10-5X2X3+5.26111×10-4X12+4.20486×10-5X22+1.89444 ×10-4X32, r2=0.7426 (Eq. S4)

***Cubic polynomials***

Y1=174.49-16.05X1-11.57X2+5.16X3-3.26X1X2-7.24X1X3-17.51X2X3-8.53X12 +6.12X22+25.88X32-0.34X1X2X3+10.85X12X2+16.77X12X3+1.98X1X22+3.77X1X32 +5.17X22X3-3.16X2X32, R2=0.9232 (Eq. S5)

Y2=0.39+0.034X1-0.03X2+0.044X3-0.023X1X2-0.019X1X3-9.25×10-3X2X3 +0.032X12+0.017X22+0.03X32+5.375×10-3X1X2X3+0.021X12X2-0.021X12X3+6.646 ×10-3X1X22-0.037X1X32+1.375×10-3X22X3-0.011X2X32, R2=0.9481 (Eq. S6)

Fig. S1 The 1H-NMR spectra of mPEG-DCA-SA, mPEG-DCA-DTPA, and mPEG-DCA.

Fig. S2 The 1H-NMR spectra of mPEG-DCA-SS-PTX (PDSP), mPEG-DCA-CC-PTX (PDCP), paclitaxel (PTX).

Fig. S3 The IR spectra of mPEG-DCA, mPEG-DCA-SA, mPEG-DCA-DTPA, mPEG-DCA-CC-PTX (PDCP), and mPEG-DCA-SS-PTX (PDSP).

Fig. S4 The figures of the central composite design-response surface method. PDI: polydispersity index.

Fig. S5 The inhibition rate calculated by tumor mass. **P*<0.05, ***P*<0.01, ****P*<0.001.

Fig. S6 The TTR of three paclitaxel (PTX) formulations in tumor tissues within 24 h (n=6).

Table S1 Particle size and PDI of two prodrug micelles after or before lyophilization.

| Samples | Before lyophilization | | After lyophilization | | Zeta potential  (mV) |
| --- | --- | --- | --- | --- | --- |
| Size (nm) | PDI | Size (nm) | PDI |
| PDSP | 177.6±5.0 | 0.307±0.1 | 185.0±4.1 | 0.315±0.11 | -14.3±1.25 |
| PDCP | 228.6±4.9 | 0.329±0.1 | 232.3±8.3 | 0.318±0.15 | -9.4±0.87 |
| PDSP: mPEG-DCA-SS-PTX, PDCP: mPEG-DCA-CC-PTX, PDI: polydispersity index. | | | | | |

Table S2 The IC50 values (μg/mL) of six PTX formulations against SMMC-7721, MCF-7, and A549/PTX cells after treatment for 24 h and 48 h.

| Formulations | 24 h | | | 48 h | | |
| --- | --- | --- | --- | --- | --- | --- |
| SMMC-7721 | MCF-7 | A549/PTX | SMMC-7721 | MCF-7 | A549/PTX |
| PTX injection | 84.62 | 42.11 | 2542.09 | 106.02 | 14.23 | 632.49 |
| PTX injection +BM | 29.43 | 19.51 | 304.88 | 58.04 | 4.80 | 184.92 |
| PDCP | 10.83 | 8.91 | 129.83 | 6.19 | 3.79 | 94.33 |
| PDCP+GSH | 9.47 | 6.68 | 93.65 | 3.74 | 2.18 | 53.71 |
| PDSP | 3.17 | 2.65 | 33.72 | 1.25 | 0.77 | 17.33 |
| PDSP+GSH | 1.63 | 1.33 | 16.23 | 0.70 | 0.29 | 8.01 |
| R1 | 2.88 | 2.16 | 8.34 | 1.83 | 2.97 | 3.42 |
| R2 | 3.42 | 3.36 | 3.85 | 4.97 | 4.93 | 5.44 |
| R3 | 1.94 | 1.99 | 2.08 | 1.79 | 2.64 | 2.16 |
| R1: the IC50 ratio of paclitaxel (PTX) injection to PTX injection+Blank micelle (BM); R2: the IC50 ratio of PDCP (mPEG-DCA-CC-PTX) to PDSP (mPEG-DCA-SS-PTX); R3: the IC50 ratio of PDSP to PDSP+Glutathione (GSH). | | | | | | |
